# Supplementary material
Source: PubMed Central journal article supplement (PMC7736094)
Supplement: NIHMS1613720-supplement-appendix_7.pdf [file NIHMS1613720-supplement-appendix_7.pdf]

|           |   |   |   |   |   |
|-----------|---|---|---|---|---|
| PRBILI.i  |   |   |   |   |   |
| PRSGOT.i  |   |   |   | X |   |
| PRALKPH.i |   | X |   |   |   |
| PRWBC.i   |   |   |   |   |   |
| PRHCT.i   |   |   |   | X | X |
| PRPLATE.i |   | X |   |   | X |
| PRPTT.i   |   | X | X | X |   |
| PRINR.i   |   |   |   | X | X |
| PRPT.i    | X |   | X |   | X |

All variable names and definitions are as provided by ACS-NSQIP
