# Supplementary material
Source: PubMed Central journal article supplement (PMC7736094)

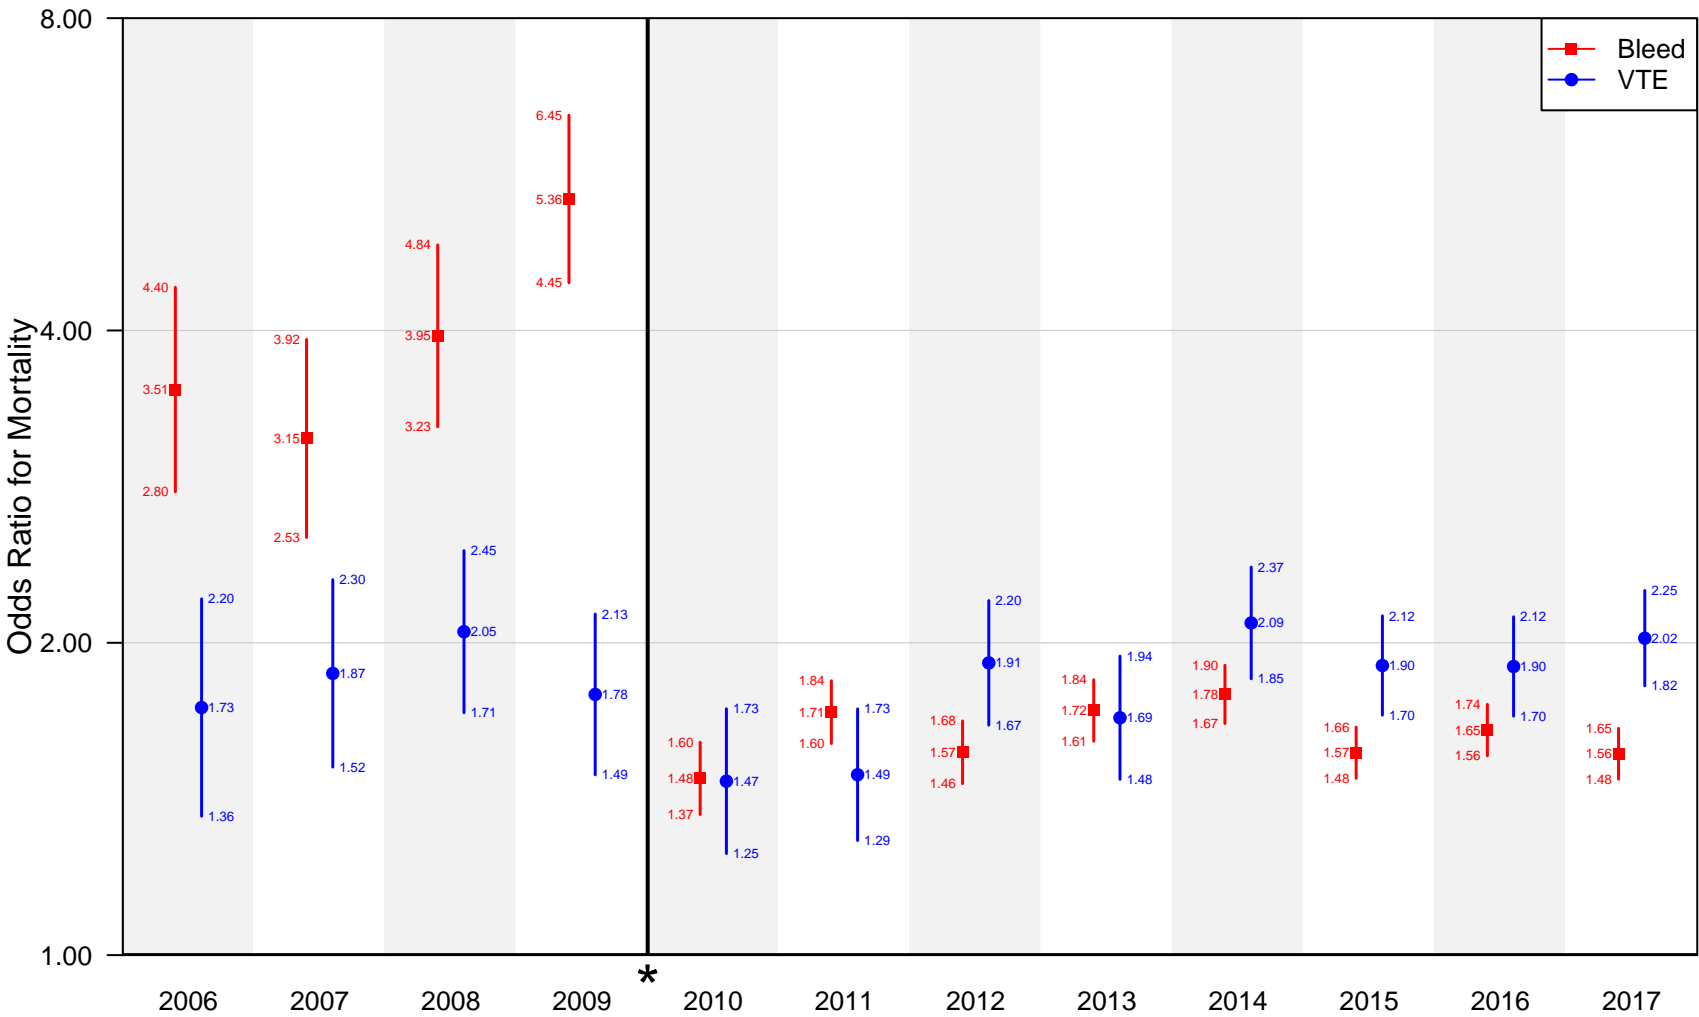

Supplement: NIHMS1613720-supplement-appendix_3.pdf [file NIHMS1613720-supplement-appendix_3.pdf]

|           |        |        |        |        |        |        |        |        |        |        |         |         |
|-----------|--------|--------|--------|--------|--------|--------|--------|--------|--------|--------|---------|---------|
| Patients: | 152287 | 211349 | 271253 | 336098 | 363374 | 442080 | 543840 | 651889 | 750901 | 885458 | 1000393 | 1028713 |
| Deaths:   | 2707   | 3683   | 4629   | 5391   | 6162   | 6982   | 6838   | 7877   | 9185   | 10683  | 11426   | 11293   |
| Bleed:    | 929    | 1044   | 1227   | 1464   | 22182  | 37121  | 40500  | 43420  | 43805  | 45620  | 46851   | 46003   |
| VTE:      | 1475   | 2021   | 2665   | 3029   | 3361   | 4031   | 4707   | 5516   | 6308   | 7447   | 8028    | 8249    |

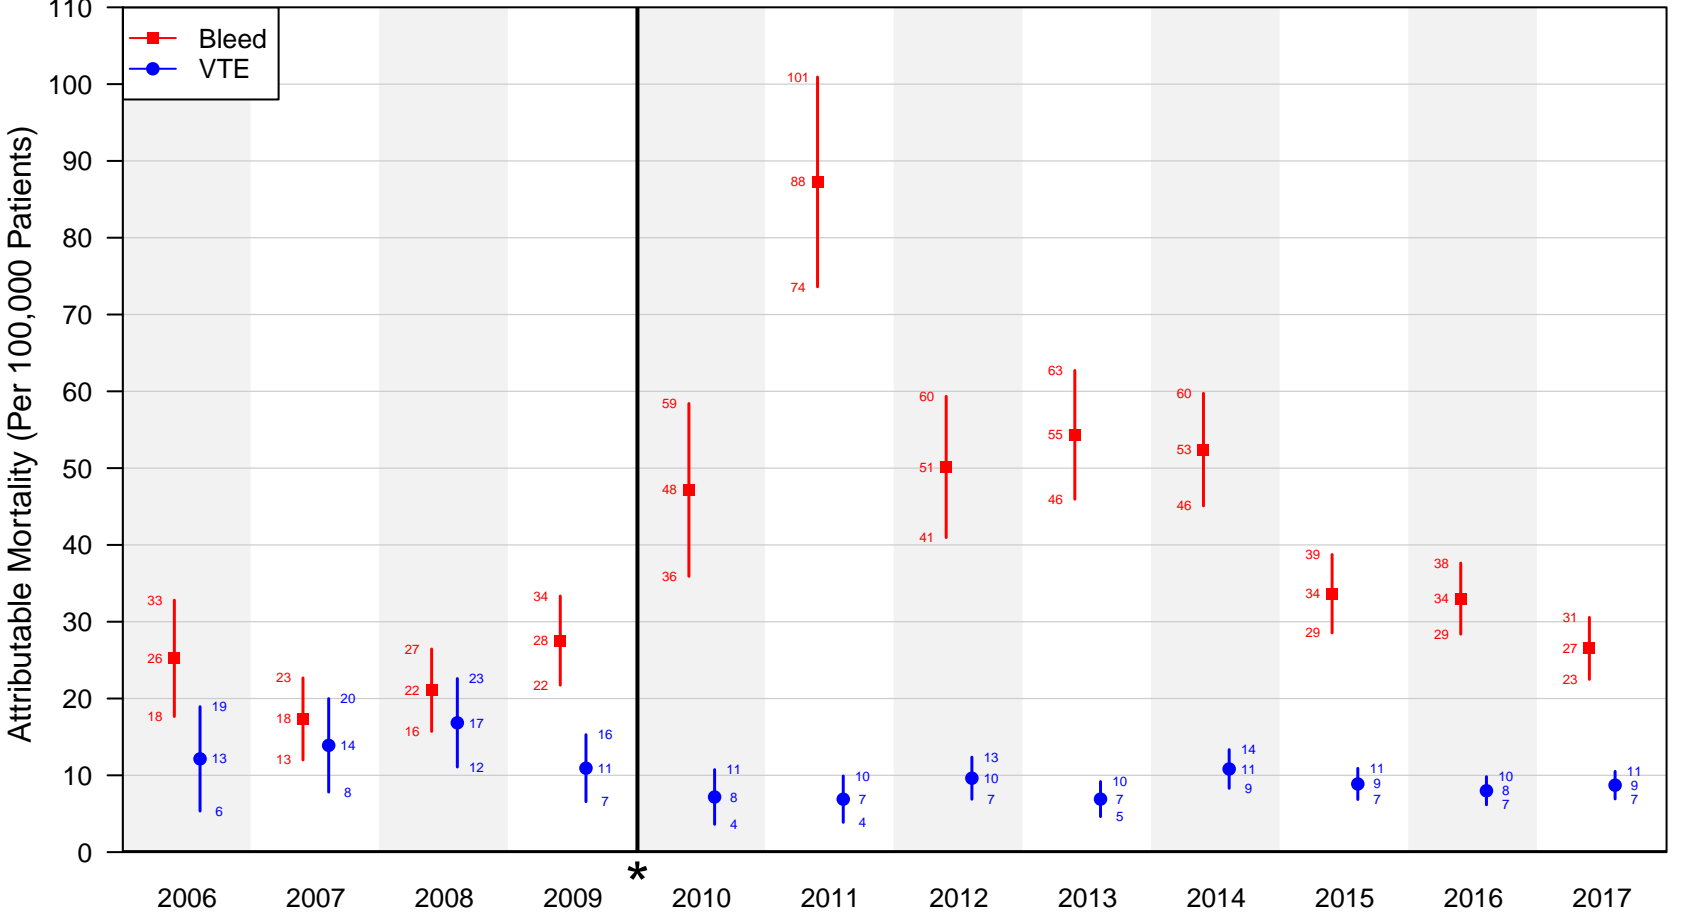

Supplement: NIHMS1613720-supplement-appendix_4.pdf [file NIHMS1613720-supplement-appendix_4.pdf]

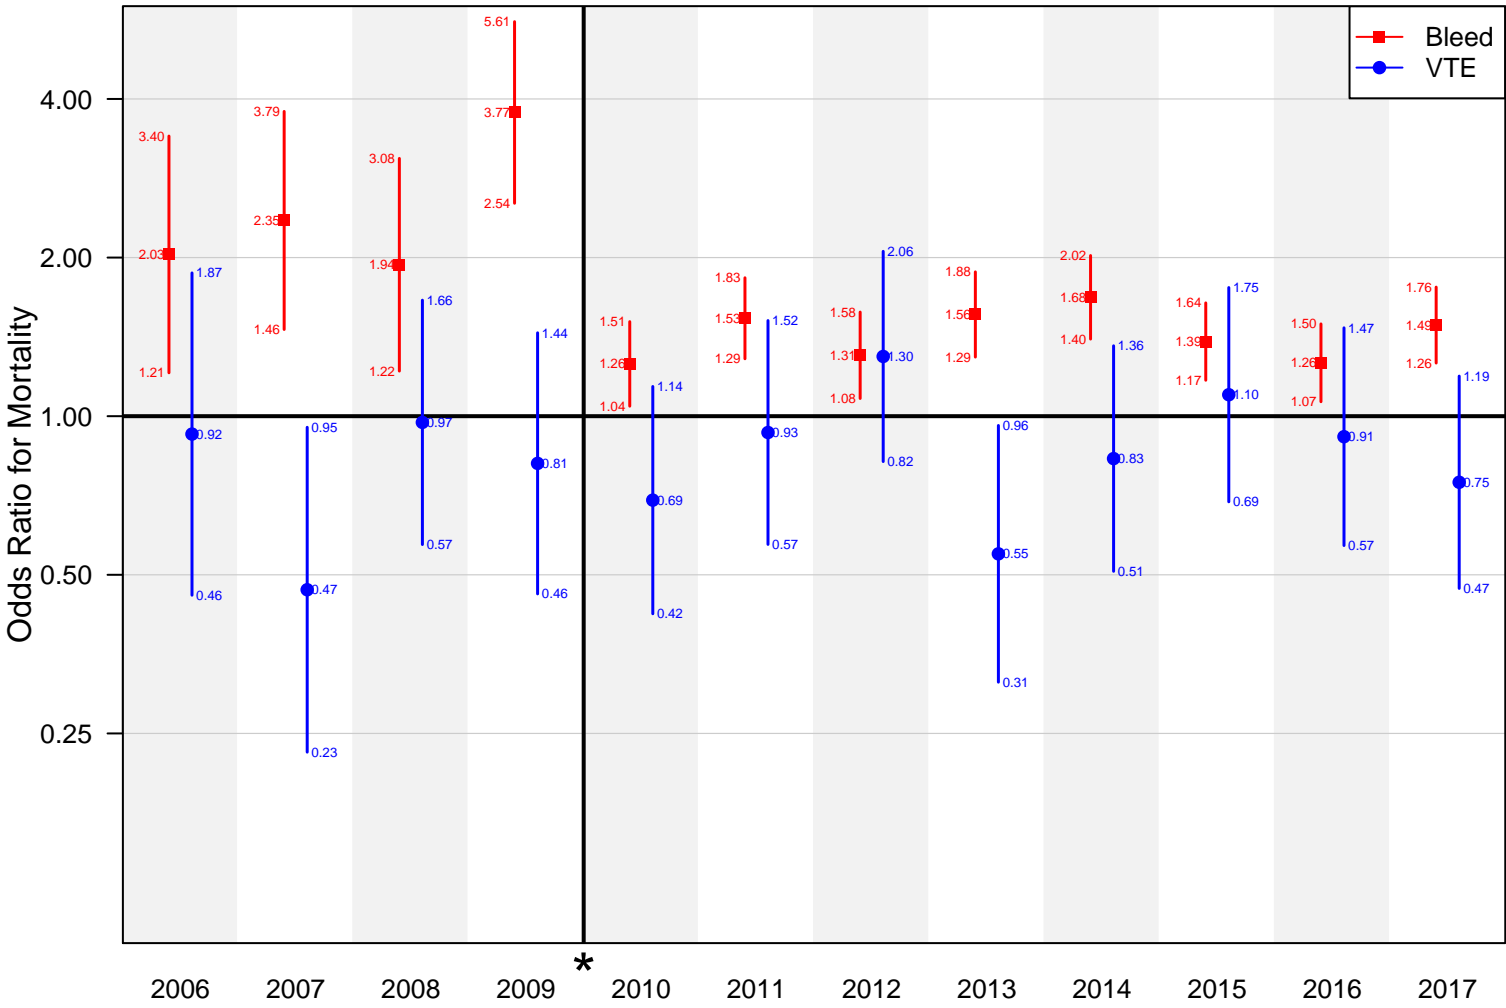

Supplement: NIHMS1613720-supplement-appendix_5.pdf [file NIHMS1613720-supplement-appendix_5.pdf]

|           |       |       |       |       |       |       |       |       |       |       |       |       |
|-----------|-------|-------|-------|-------|-------|-------|-------|-------|-------|-------|-------|-------|
| Patients: | 18281 | 27090 | 33528 | 37522 | 37517 | 40096 | 42754 | 47253 | 49394 | 53467 | 57364 | 56759 |
| Deaths:   | 685   | 925   | 1215  | 1267  | 1362  | 1422  | 1250  | 1469  | 1544  | 1657  | 1645  | 1690  |
| Bleed:    | 296   | 330   | 356   | 421   | 5331  | 7048  | 6426  | 6730  | 6739  | 6676  | 7010  | 6783  |
| VTE:      | 268   | 326   | 408   | 433   | 446   | 409   | 437   | 445   | 435   | 458   | 504   | 530   |

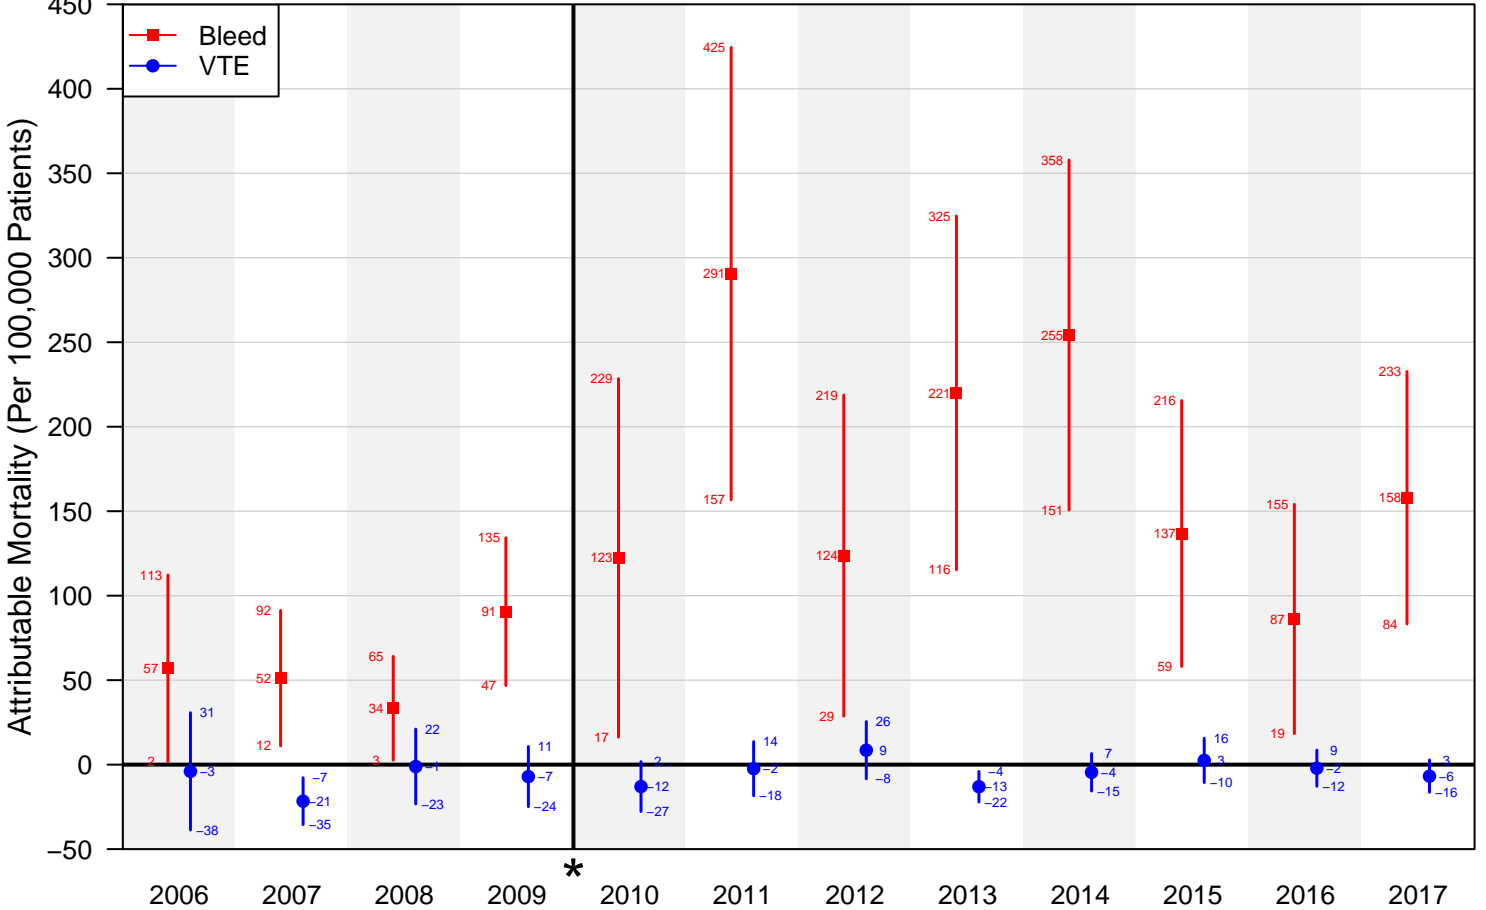

Supplement: NIHMS1613720-supplement-appendix_6.pdf [file NIHMS1613720-supplement-appendix_6.pdf]
